# Supplementary material for: Highly efficient polymer solar cells based on low-temperature processed ZnO: application of a bifunctional Au@CNTs nanocomposite
Source: Royal Society of Chemistry journal article supplement (doi:10.1039/c8tc05653f), 2019-01-01
Supplement: c8tc05653f1.pdf [file c8tc05653f1.pdf]

## Supporting Information

# Highly Efficient Polymer Solar Cells Based on Low-Temperature Processed ZnO: Application of A Bifunctional Au@CNTs Nanocomposites

*Chang Li<sup>1</sup>, Ge Wang<sup>1</sup>, Yajun Gao<sup>2</sup>, Chen Wang<sup>1</sup>, Shanpeng Wen<sup>\*1</sup>, Huayang Li<sup>1</sup>, Jiaxin Wu<sup>1</sup>, Liang Shen<sup>1</sup>, Wenbin Guo<sup>1</sup> and Shengping Ruan<sup>1</sup>*

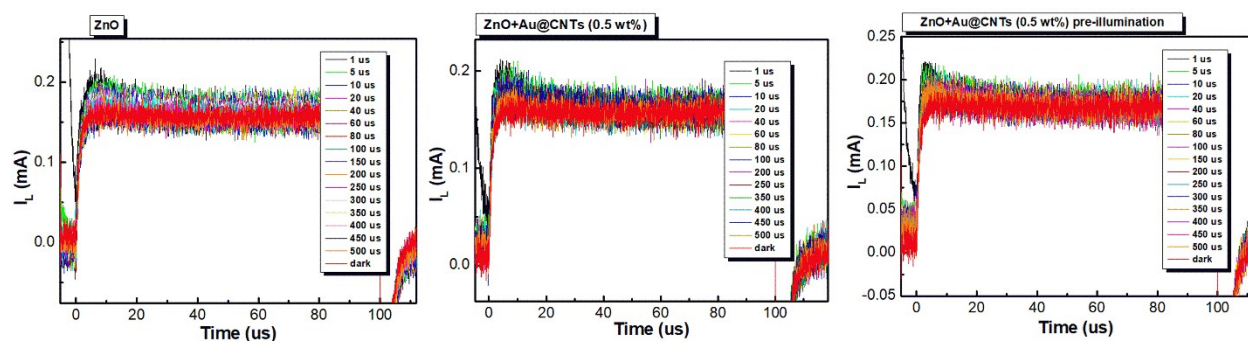

**Figure S1.** The typical photo-CELIV curves based on device using ZnO and ZnO+Au@CNTs ETL.

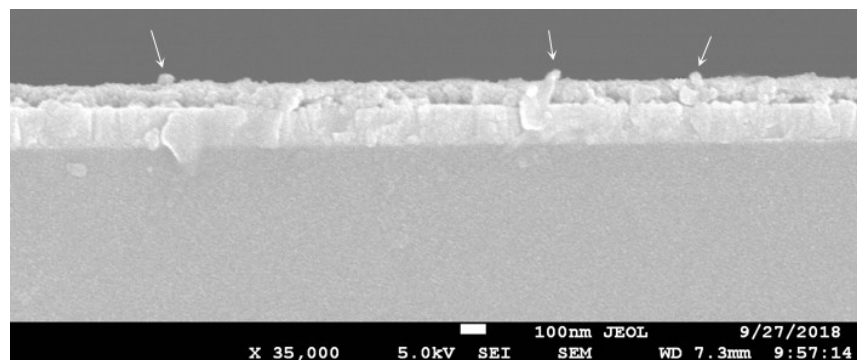

**Figure S2.** SEM cross-section image of Au@CNTs-doped ZnO on ITO substrate.

we calculated the IQE spectra of devices based on sol-gel ZnO and Au@CNTs+ZnO nanocomposite layer. The IQE determination follow such procedures which is also an often-used methodology in reported works:<sup>[1-3]</sup> we firstly measured the reflectance (R) spectra of real devices configuring ITO/ZnO(or ZnO+Au@CNTs with different weight ratio)/PTB7-Th:PC<sub>71</sub>BM/MoO<sub>3</sub>/Ag(100 nm). Total absorption (A) is derived by 1-R-T in which T is assumed to be zero considering the thick Ag electrode. Then we calculated IQE spectra by EQE/(1-R-T).

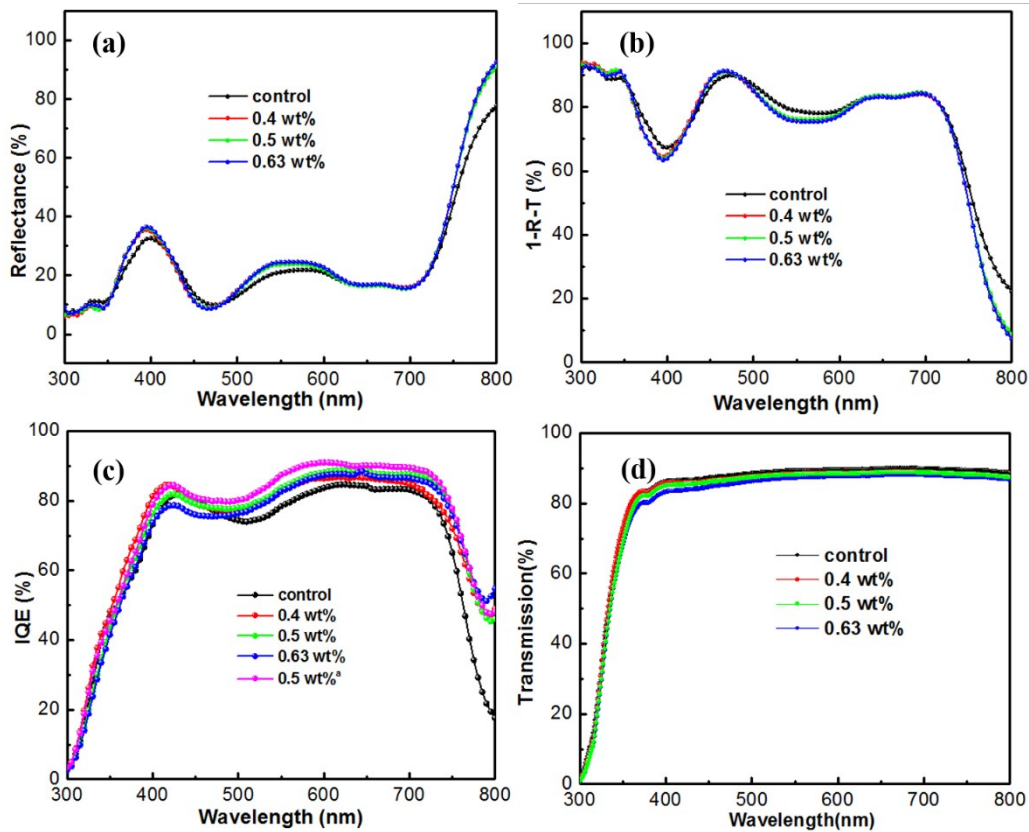

**Figure S3.** The reflection spectra (a), total absorption spectra (b) and IQE spectra (c) of ZnO and ZnO+Au@CNTs composite layer-based devices; (d) The transmission spectra of ZnO and ZnO+Au@CNTs film.

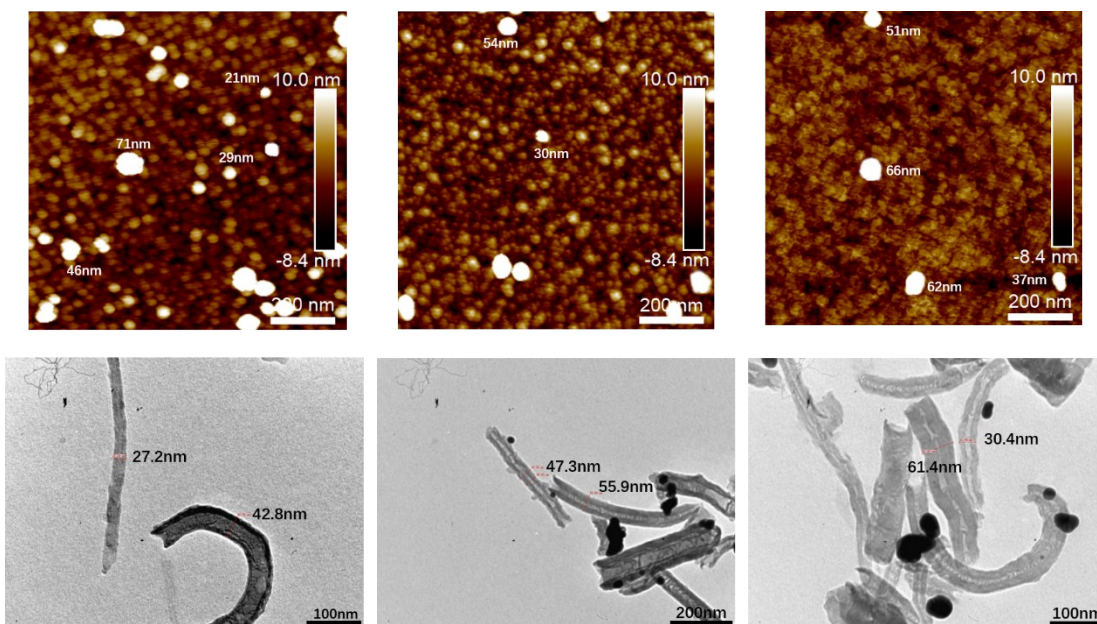

**Figure S4.** AFM height images of ZnO film with 0.5 wt% Au@CNTs (randomly selected area from different individual sample); TEM images of Au@CNTs composite structure.

## Reference

- [1] Park, S. H.; Roy, A.; Beaupre, S.; Cho, S.; Coates, N.; Moon, J. S.; Moses, D.; Leclerc, M.; Lee, K.; Heeger, A. J. Bulk heterojunction solar cells with internal quantum efficiency approaching 100%. *Nature Photonics* 2009, 3, 297-303.
- [2] Baek, S.-W.; Noh, J.; Lee, C.-H.; Kim, B.; Seo, M.-K.; Lee, J.-Y. Plasmonic Forward Scattering Effect in Organic Solar Cells: A Powerful Optical Engineering Method. *Sci. Rep.* 2013, 3, 1726.
- [3] Armin, A.; Velusamy, M.; Wolfer, P.; Zhang, Y.; Burn, P. L.; Meredith, P.; Pivrikas A. Quantum Efficiency of Organic Solar Cells: Electro-Optical Cavity Considerations. *ACS Photonics*, 2014, 1, 173-181.
